# Supplementary material for: PDMS membranes containing ZIF-coated mesoporous silica spheres for efficient ethanol recovery via pervaporation
Source: Royal Society of Chemistry journal article supplement (doi:10.1039/c6ta04700a), 2016-01-01
Supplement: c6ta04700a1.pdf [file c6ta04700a1.pdf]

# **PDMS membranes containing ZIF-coated mesoporous silica spheres for efficient ethanol recovery via pervaporation**

**Parimal V. Naik,<sup>a</sup> Lik H. Wee,<sup>\*a</sup> Maria Meledina,<sup>b</sup> Stuart Turner,<sup>b</sup> Yanbo Li,<sup>a</sup> Gustaaf Van Tendeloo,<sup>b</sup> Johan A. Martens,<sup>a</sup> Ivo F. J. Vankelecom<sup>a\*</sup>**

*<sup>a</sup>Centre for Surface Chemistry and Catalysis, KU Leuven, Celestijnenlaan 200f, B3001, Post box 2461, Heverlee, Leuven, Belgium.*

*<sup>b</sup>Electron Microscopy for Materials Science, University of Antwerp, Groenenborgerlaan 171, B2020, Antwerp, Belgium.*

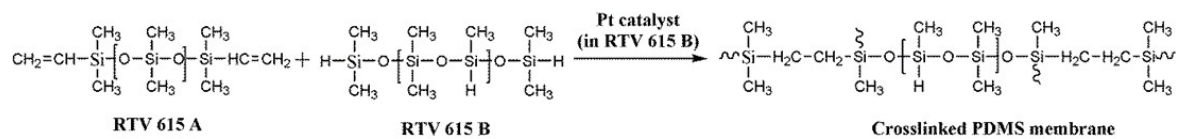

**Fig. S1. Preparation of MMMs with assumed chemical composition of the RTV 615**

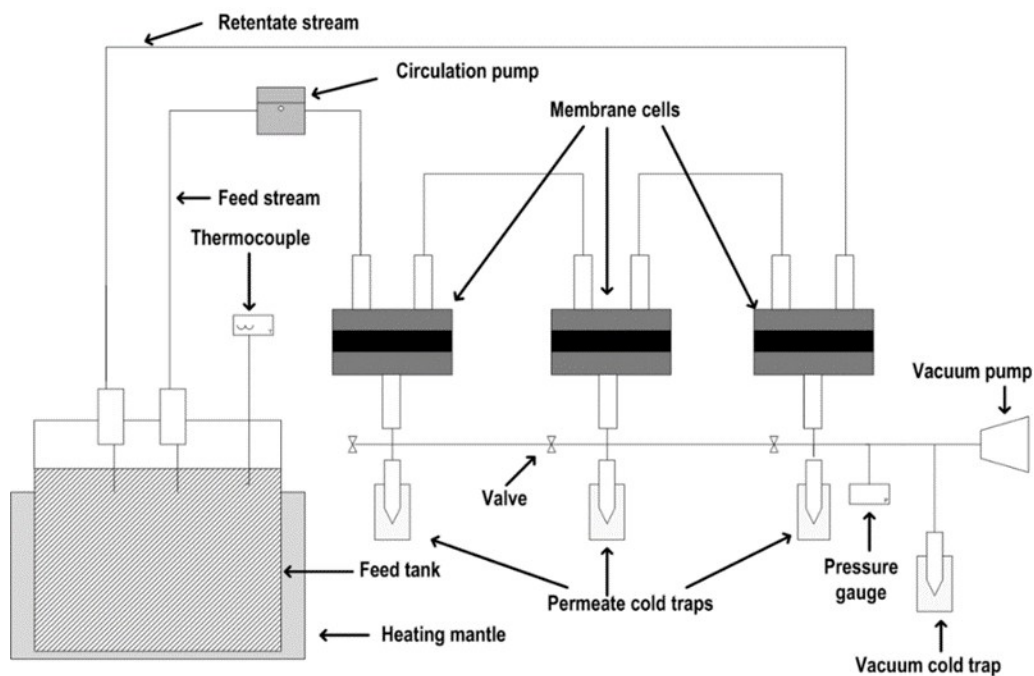

compounds.

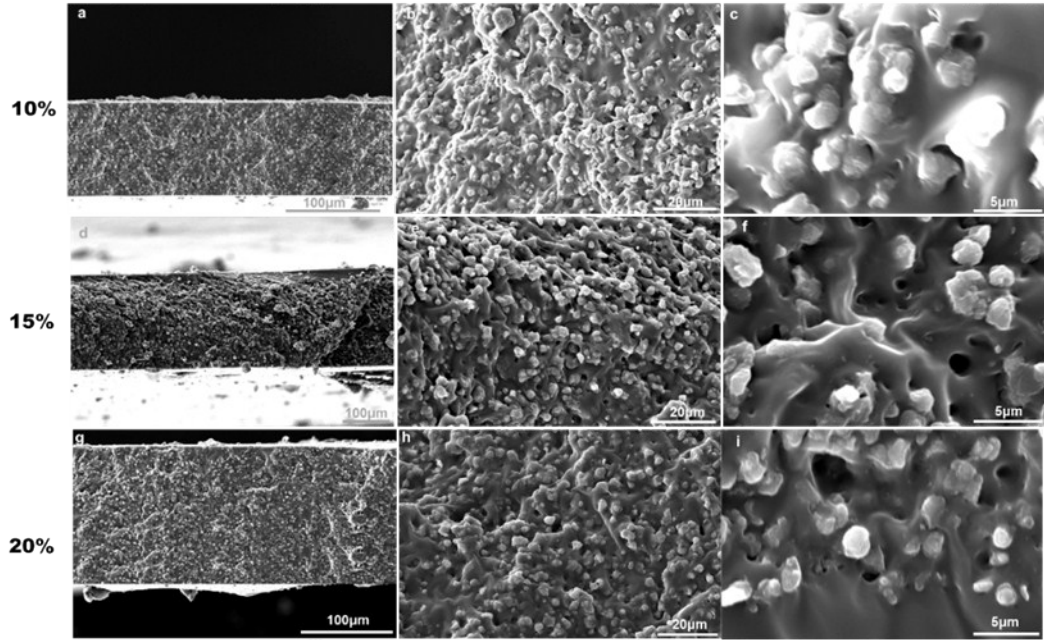

Fig.

S2.

Pervaporation cross-flow set-up with 3 membrane cells in series.

**Fig. S3. Cross-sectional SEM micrographs of MMMs filled with MSS-ZIF-8 core-shell sphere. (a-c) 10 wt%, (d-f) 15 wt%, and (g-I) 20 wt% loading viewed at different magnifications.**
